# Supplementary material for: Rapid Heme Transfer Reactions between NEAr Transporter Domains of Staphylococcus aureus: A Theoretical Study Using QM/MM and MD Simulations
Source: PLOS journal article supplement (doi:10.1371/journal.pone.0145125), 2015-12-14
Supplement: S1 (10.1371/journal.pone.0145125.s001) [file journal.pone.0145125.s001]

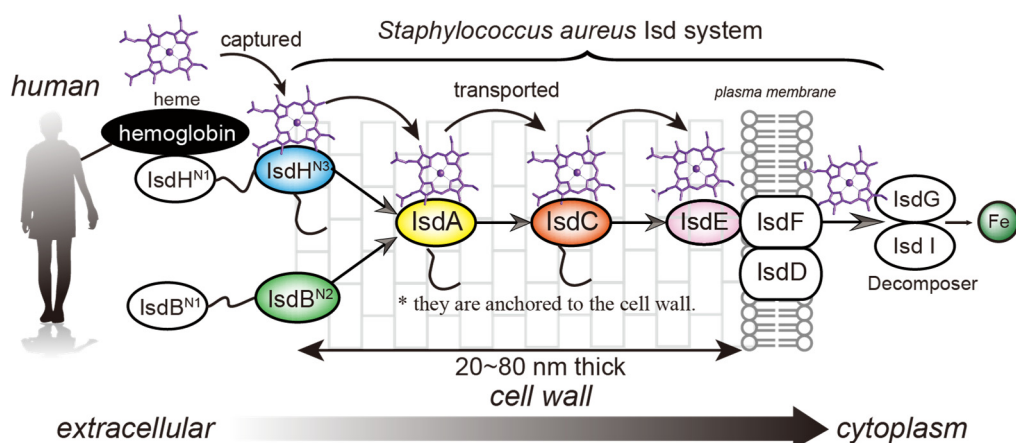

**Figure A.** An outline view of the Isd system of *Staphylococcus aureus*. Hemoglobin is initially sequestered by IsdH-N1/N2 (or IsdB-N1), and the extracted heme is subsequently bound to IsdH-N3 (or IsdB-N2). Heme is then transferred across the cell wall for decomposition by IsdG/IsdI.

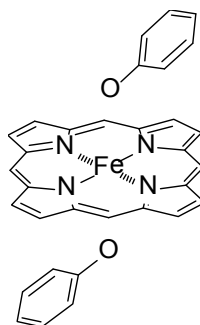

**Figure B.** A model of Fe(III)-porphine and two phenolate molecules for PES scan.

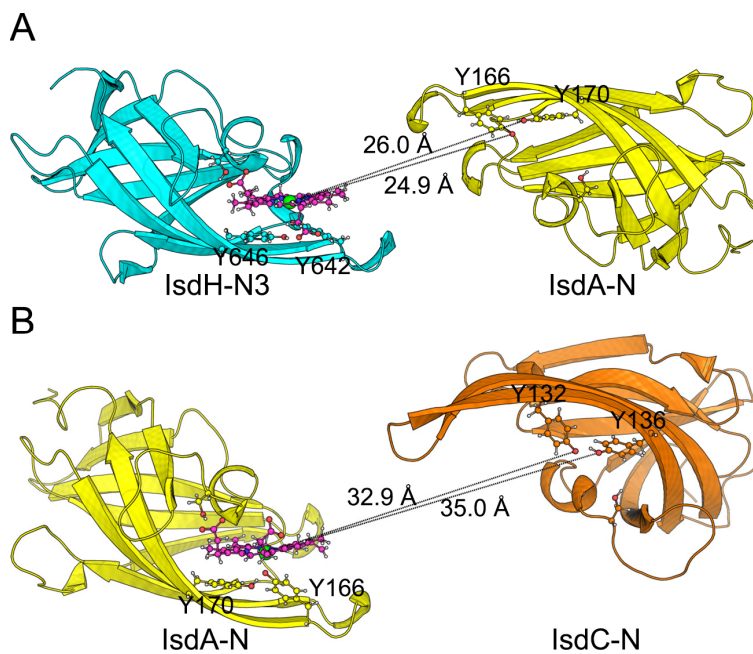

**Figure C.** Initial coordinates for MD simulations. (A) An IsdH-N3-heme complex with IsdA-N. (B) An IsdA-N-heme complex with IsdC-N.

**Table A. Distance restraints used for MD simulations<sup>a</sup>**

|                                     | Atom 1                        | Atom 2         | Equilibrium distance $r$ (Å) | Force constant $k$ (kcal mol <sup>-1</sup> Å <sup>-2</sup> ) |
|-------------------------------------|-------------------------------|----------------|------------------------------|--------------------------------------------------------------|
| IsdH-N3•<br>heme•IsdA-N<br>(Set HA) | IsdH <sup>N3</sup> -Ser563-OG | Heme-O1D       | 2.8727                       | 10.0                                                         |
|                                     | IsdH <sup>N3</sup> -Tyr646-OH | Heme-FE        | 4.0461                       | 30.0                                                         |
|                                     | IsdA-Tyr166-OH                | IsdA-Tyr170-OH | 2.700                        | 0.1                                                          |
|                                     | IsdA-Tyr166-OH                | Heme-FE        | 2.200                        | 0.1                                                          |
|                                     | IsdA-Ser82-OG                 | Heme-O1A       | 2.8727                       | 0.1                                                          |
|                                     | Heme-HVT4                     | IsdA-Trp113-CA | 3.000                        | 0.1                                                          |
| IsdA-N•<br>heme•IsdC-N<br>(set AC1) | IsdA-Ser82-OG                 | Heme-O1D       | 2.8727                       | 10.0                                                         |
|                                     | IsdA-Tyr170-OH                | Heme-FE        | 4.0461                       | 10.0                                                         |
|                                     | IsdC-Tyr132-OH                | IsdC-Tyr136-OH | 2.507                        | 1.0                                                          |
|                                     | IsdC-Tyr132-OH                | Heme-FE        | 2.200                        | 0.1                                                          |
|                                     | IsdC-Ser47-OG                 | Heme-O1A       | 2.8727                       | 0.1                                                          |
|                                     | Heme-HVT2                     | IsdC-Trp77-CA  | 3.000                        | 0.1                                                          |
| IsdA-N•<br>heme•IsdC-N<br>(set AC2) | IsdA-Ser82-OG                 | Heme-O1D       | 2.8727                       | 1.0                                                          |
|                                     | IsdA-Tyr170-OH                | Heme-FE        | 4.0461                       | 1.0                                                          |
|                                     | IsdC-Tyr132-OH                | IsdC-Tyr136-OH | 2.507                        | 0.1                                                          |
|                                     | IsdC-Ser47-OG                 | Heme-O1A       | 2.8727                       | 0.05                                                         |

<sup>a</sup>Atom names are presented in Figure . Forces acting on each object were calculated as  $k(R-r)^2$ , where  $R$  is the distance between objects (Å),  $k$  is the force constant (kcal mol<sup>-1</sup> Å<sup>-2</sup>), and  $r$  is the equilibrium distance (Å).

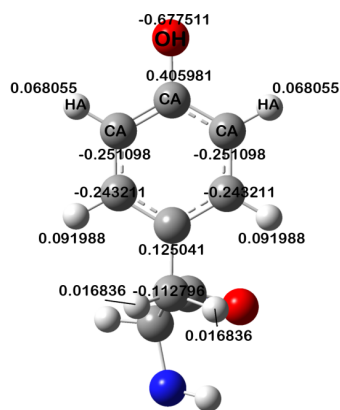

**Figure D. Partial charges used for tyrosinate residues in the apo-form of Isd-NEAT domains.** Partial charges were calculated using the restrained electrostatic potential (RESP) method with the ANTECHAMBER module in AmberTools 13.

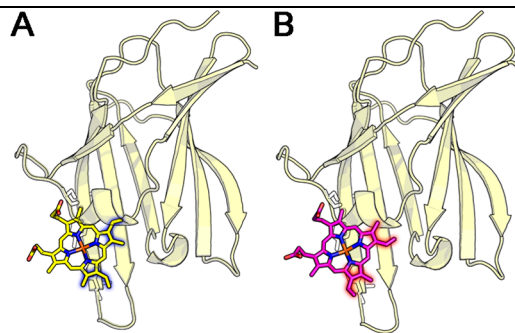

**Figure E. Differences in heme positions on IsdA.** Both sides of heme can enter the binding site of IsdA (PDB: 2ITF). (A) and (B) represent A and B positions of heme in the A chain, respectively.

---
